# Supplementary material
Source: PubMed Central journal article supplement (PMC2662689)
Supplement: NIHMS79366-supplement-Supp_table_1.pdf [file NIHMS79366-supplement-Supp_table_1.pdf]

**Electronic supplementary material**

**ESM Table 1** Characteristics of initial scan and replication study participants

| Study traits                                                 | WTCCC      |          | DGI        |            | FUSION     |                       | DUNDEE     |            |
|--------------------------------------------------------------|------------|----------|------------|------------|------------|-----------------------|------------|------------|
|                                                              | Cases      | Controls | Cases      | Controls   | Cases      | Controls <sup>a</sup> | Cases      | Controls   |
| Overall sample size                                          | 1,924      | 2,938    | 1,022      | 1,075      | 1,161      | 1,174                 | 3,125      | 3,596      |
| Men (%)                                                      | 58.1       | 49.2     | 51.2       | 48.2       | 56.2       | 48.9                  | 55.5       | 50.2       |
| Age (years) at diagnosis or study, mean (SD) or median (IQR) | 50 (9)     | N/A      | 65 (10)    | 59(10)     | 53 (12.0)  | 70 (8.0)<br>62 (9.0)  | 58 (12)    | 60 (13)    |
| BMI (kg/m <sup>2</sup> ), mean (SD) or median (IQR)          | 31.3 (6.2) | N/A      | 28.1 (4.1) | 27.6 (3.7) | 29.8 (6.1) | 26.8 (5.0)            | 31.0 (6.0) | 26.9 (4.6) |

<sup>a</sup>FUSION controls come from two sources: see [43]

IQR, interquartile range
