# Supplementary material
Source: PubMed Central journal article supplement (PMC2662689)
Supplement: NIHMS79366-supplement-Supp_table_2.pdf [file NIHMS79366-supplement-Supp_table_2.pdf]

### Electronic supplementary material

**ESM Table 2** Description of SNP effects on circulating protein levels in the InCHIANTI study [21] and measures used from previous type 2 diabetes prospective studies to derive estimates of expected effects of SNP on type 2 diabetes risk

| Gene        | Protein levels | SNP        | Allelic effect size of SNP on protein levels in InCHIANTI | Prospective study          | Difference between extreme quantiles of inflammatory protein levels | Diabetes RR (95% CI) corresponding to the extreme quantiles of inflammatory protein levels | Expected diabetes RR (95% CI) corresponding to the per allele effect of SNP on inflammatory protein levels |
|-------------|----------------|------------|-----------------------------------------------------------|----------------------------|---------------------------------------------------------------------|--------------------------------------------------------------------------------------------|------------------------------------------------------------------------------------------------------------|
| <i>IL18</i> | IL-18          | rs2250417  | 68.24 pg/ml                                               | MONICA/KORA Augsburg Study | 242 pg/ml                                                           | 1.96 (1.49–2.58)                                                                           | 1.21 (1.12–1.31)                                                                                           |
| <i>IL6R</i> | IL-6           | rs8192284  | 0.17 pg/ml                                                | Nurses' Health Study       | 3.36 pg/ml                                                          | 3.25 (2.30–4.58)                                                                           | 1.06 (1.04–1.08)                                                                                           |
| <i>CRP</i>  | CRP            | rs12093699 | 0.69 µg/ml                                                | (EPIC)-Potsdam Study       | 2.95 µg/ml                                                          | 3.50 (2.50–4.10)                                                                           | 1.34 (1.23–1.39)                                                                                           |
