# Supplementary material
Source: PubMed Central journal article supplement (PMC2662689)
Supplement: NIHMS79366-supplement-Supp_table_3.pdf [file NIHMS79366-supplement-Supp_table_3.pdf]

### Electronic supplementary material

**ESM Table 3** Results for inflammatory and autoimmune disease SNPs using the best available directly genotyped proxies

| <i>Cis</i> -effect inflammatory gene or disease SNP | Best proxy genotyped SNP ( $r^2 > 0.5$ ) | Disease/circulating protein         | Gene         | Meta-analysis OR for developing type 2 diabetes (95% CI) if genotyped in WTCCC and DGI | <i>p</i> value for OR |
|-----------------------------------------------------|------------------------------------------|-------------------------------------|--------------|----------------------------------------------------------------------------------------|-----------------------|
| rs4251961                                           | rs4251961<br>( $r^2 = 1.0$ )             | IL-1RA                              | <i>IL1RN</i> | 1.03 (1.00–1.06)                                                                       | 0.05                  |
| rs6761276 <sup>a</sup>                              | rs6759676<br>( $r^2 = 0.97$ )            | IL-1RA                              | <i>IL1RN</i> | 1.05 (0.99–1.11)                                                                       | 0.09                  |
| rs2250417                                           | rs4935984<br>( $r^2 = 0.62$ )            | IL-18                               | <i>IL18</i>  | 0.99 (0.97–1.03)                                                                       | 0.79                  |
| rs5744256                                           | rs1834481<br>( $r^2 = 1.0$ )             | IL-18                               | <i>IL18</i>  | 1.03 (1.01–1.05)                                                                       | 0.05                  |
| rs12093699                                          | rs12739022<br>( $r^2 = 0.92$ )           | CRP                                 | <i>CRP</i>   | 1.00 (0.98–1.02)                                                                       | 0.80                  |
| rs2227631                                           | No proxy                                 | PAI-1                               | <i>PAI1</i>  |                                                                                        |                       |
| rs8192284 <sup>a</sup>                              | rs4537545<br>( $r^2 = 0.96$ )            | sIL-6R                              | <i>IL6R</i>  | 1.04 (0.98–1.10)                                                                       | 0.23                  |
| rs1007888                                           | rs1002286<br>( $r^2 = 0.97$ )            | MIF                                 | <i>MIF</i>   | 1.00 (0.91–1.10)                                                                       | 0.95                  |
| rs11209032                                          | rs11209033<br>( $r^2 = 1.0$ )            | Ankylosing spondylitis              | <i>IL23R</i> | 0.97 (0.94–1.01)                                                                       | 0.05                  |
| rs11805303                                          | rs11805303<br>( $r^2 = 1.0$ )            | Crohn's disease                     | <i>IL23R</i> | 0.96 (0.92–1.01)                                                                       | 0.12                  |
| rs2542151 <sup>a</sup>                              | rs2847297<br>( $r^2 = 0.56$ )            | Crohn's disease and type 1 diabetes | <i>PTPN2</i> | 1.01 (0.95–1.08)                                                                       | 0.69                  |

|                        |                              |                                                           |                                        |                   |      |
|------------------------|------------------------------|-----------------------------------------------------------|----------------------------------------|-------------------|------|
| rs6679677              | rs6679677<br>( $r^2=1.0$ )   | Rheumatoid arthritis, Crohn's disease and type 1 diabetes | <i>PTPN22</i>                          | 1.02 (0.98–1.07)  | 0.34 |
| rs2104286              | rs2104286<br>( $r^2=1.0$ )   | Type 1 diabetes and multiple sclerosis                    | <i>IL2RA</i>                           | 1.02 (0.94–1.11)  | 0.58 |
| rs17696736             | rs17696736<br>( $r^2=1.0$ )  | Type 1 diabetes and coeliac disease                       | <i>SH2B3</i>                           | 1.01 (0.99–1.04)  | 0.33 |
| rs653178               | No proxy                     | Type 1 diabetes and coeliac disease                       | <i>SH2B3</i>                           |                   |      |
| rs30187                | rs27710<br>( $r^2=1.0$ )     | Ankylosing spondylitis                                    | <i>ARTS1</i>                           | 0.98 (0.91–1.06)  | 0.71 |
| rs6822844              | rs13143866<br>( $r^2=0.52$ ) | Coeliac disease                                           | <i>IL21, IL2, TENR, KIAA1109</i>       | 0.98 (0.952–1.02) | 0.46 |
| rs2816316              | rs1323296<br>( $r^2=1.0$ )   | Coeliac disease                                           | <i>RGS1</i>                            | 0.99 (0.95–1.03)  | 0.59 |
| rs13015714             | rs4851007<br>( $r^2=1.0$ )   | Coeliac disease                                           | <i>IL1RL1, IL18R1, IL18RAP, SLC9A4</i> | 1.03 (0.99–1.06)  | 0.12 |
| rs17810546             | rs17809756<br>( $r^2=1.0$ )  | Coeliac disease                                           | <i>IL12A</i>                           | 1.01 (0.97–1.06)  | 0.49 |
| rs1464510              | rs9864529<br>( $r^2=0.79$ )  | Coeliac disease                                           | <i>LPP</i>                             | 0.99 (0.97–1.03)  | 0.83 |
| rs1738074 <sup>a</sup> | rs2016588<br>( $r^2=0.58$ )  | Coeliac disease                                           | <i>TAGAP</i>                           | 0.98 (0.93–1.04)  | 0.52 |
| rs10883365             | rs10883365<br>( $r^2=1.0$ )  | Crohn's disease                                           | <i>NKX2-3</i>                          | 1.00 (0.98–1.03)  | 0.69 |

|                         |                              |                      |                                    |                  |      |
|-------------------------|------------------------------|----------------------|------------------------------------|------------------|------|
| rs2241880               | rs6752107<br>( $r^2=1.0$ )   | Crohn's disease      | <i>ATG16L1</i>                     | 1.00 (0.98–1.03) | 0.68 |
| rs10077785              | rs11744116<br>( $r^2=0.87$ ) | Crohn's disease      | <i>IBD5</i>                        | 0.96 (0.89–1.04) | 0.32 |
| rs10801047              | rs10801047<br>( $r^2=1.0$ )  | Crohn's disease      | Chr 1q31                           | 0.97 (0.92–1.03) | 0.34 |
| rs6596075               | rs3792884<br>( $r^2=0.61$ )  | Crohn's disease      | Chr 5q31                           | 1.05 (0.92–1.16) | 0.70 |
| rs12035082              | rs6688532<br>( $r^2=1.0$ )   | Crohn's disease      | Chr 1q24                           | 0.98 (0.94–1.03) | 0.49 |
| rs2836754               | rs2836754<br>( $r^2=1.0$ )   | Crohn's disease      | Chr 21q22                          | 0.97 (0.88–1.06) | 0.25 |
| rs17221417 <sup>a</sup> | rs2066843<br>( $r^2=1.0$ )   | Crohn's disease      | <i>CARD15</i>                      | 1.08 (1.00–1.16) | 0.03 |
| rs4958847 <sup>a</sup>  | rs4958847<br>( $r^2=1.0$ )   | Crohn's disease      | <i>IRGM</i>                        | 1.06 (0.96–1.16) | 0.24 |
| rs9858542               | rs9858542<br>( $r^2=1.0$ )   | Crohn's disease      | Chr 3p21                           | 1.00 (0.97–1.03) | 0.93 |
| rs17234657              | rs17234657<br>( $r^2=1.0$ )  | Crohn's disease      | Chr 5p13                           | 1.00 (0.97–1.05) | 0.65 |
| rs10761659              | rs10761659<br>( $r^2=1.0$ )  | Crohn's disease      | Chr 10q21                          | 0.98 (0.96–1.01) | 0.29 |
| rs10499194              | rs17066662<br>( $r^2=1.0$ )  | Rheumatoid arthritis | Chr 6q23                           | 1.03 (0.99–1.06) | 0.10 |
| rs6920220               | rs6920220<br>( $r^2=1.0$ )   | Rheumatoid arthritis | <i>TNFAIP3</i> and<br><i>OLIG3</i> | 1.01 (0.98–1.05) | 0.41 |
| rs12708716              | rs7198004<br>( $r^2=0.82$ )  | Type 1 diabetes      | <i>KIAA0350</i><br>Chr 16p13       | 1.01 (0.99–1.04) | 0.31 |

|                        |                             |                    |                                            |                  |      |
|------------------------|-----------------------------|--------------------|--------------------------------------------|------------------|------|
| rs763361               | No proxy                    | Type 1 diabetes    | <i>CD226</i> non-WTCCC, non-synonymous GWA |                  |      |
| rs3788964              | rs3788964<br>( $r^2=1.0$ )  | Type 1 diabetes    | <i>IFIH1</i>                               | 0.94 (0.86–1.02) | 0.12 |
| rs2292239              | rs2292239<br>( $r^2=1.0$ )  | Type 1 diabetes    | <i>ERBB3</i>                               | 1.00 (0.98–1.04) | 0.73 |
| rs3087243              | rs3087243<br>( $r^2=1.0$ )  | Type 1 diabetes    | <i>CTLA4</i>                               | 1.00 (0.98–1.04) | 0.62 |
| rs6897932 <sup>a</sup> | rs6897932<br>( $r^2=1.0$ )  | Multiple sclerosis | <i>IL7RA</i>                               | 1.03 (0.97–1.10) | 0.35 |
| rs6445975              | No proxy                    | SLE                | <i>PXK</i>                                 |                  |      |
| rs12537284             | rs13232316<br>( $r^2=1.0$ ) | SLE                | <i>IRF5, TNPO3</i>                         | 1.05 (1.01–1.10) | 0.01 |
| rs4963128              | No proxy                    | SLE                | <i>KIAA1542</i>                            |                  |      |
| rs9888739              | No proxy                    | SLE                | <i>ITGAM</i>                               |                  |      |

<sup>a</sup>SNPs with a directly genotyped proxy available in all three studies; for other SNPs data were from the WTCCC and DGI studies, which were both typed on the Affymetrix chip
